# Supplementary material for: Exploration of the Genetic Organization of Morphological Modularity on the Mouse Mandible Using a Set of Interspecific Recombinant Congenic Strains Between C57BL/6 and Mice of the Mus spretus Species
Source: PubMed Central journal article supplement (PMC3464118; doi:10.1534/g3.112.003285), 2012-10-01
Supplement: supp_2.10.1257_FigureS2.pdf [file supp_2.10.1257_FigureS2.pdf]

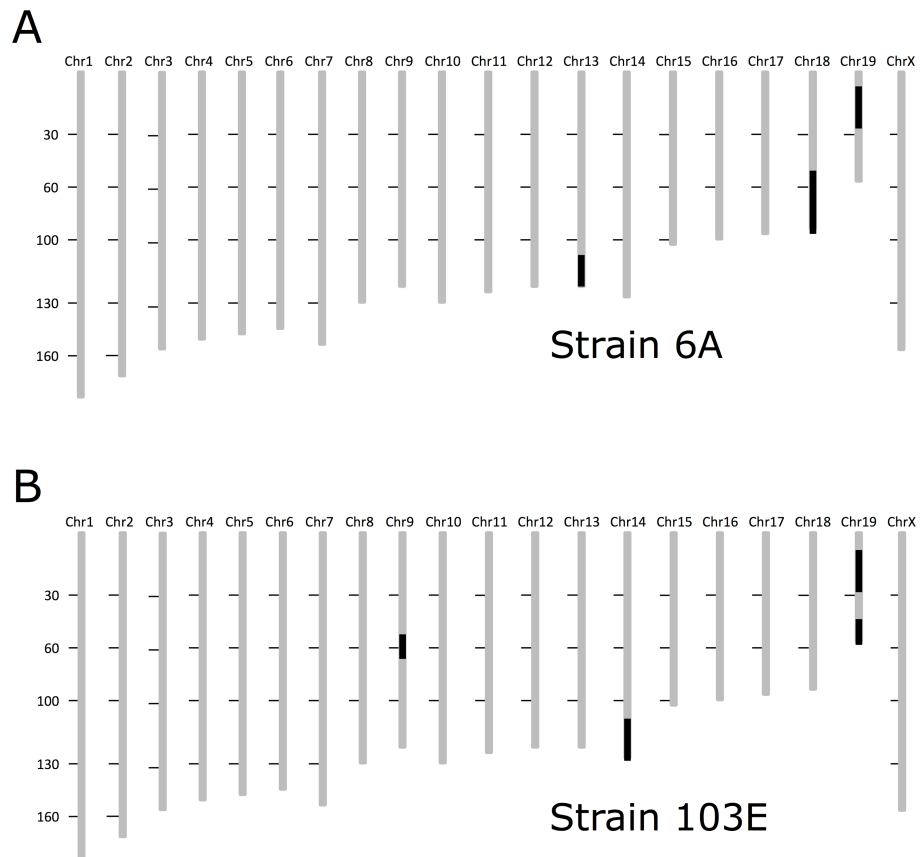

**Figure S2** Genetic map of 6A and 103E IRCs indicating the position and sizes of the SEG-derived segments. The segments of *Mus spretus* origin are displayed in solid while B6 segments are shaded. The strain 6A (A) contains 3 SEG-derived segments on the Chromosomes 13,18 and 19 whereas the strain 103E (B) contains 4 SEG-derived segments on the chromosomes 6, 14 and 19.
